# Supplementary material for: Identifying macrophage enrichment in atherosclerotic plaques by targeting dual-modal US imaging/MRI based on biodegradable Fe-doped hollow silica nanospheres conjugated with anti-CD68 antibody
Source: Royal Society of Chemistry journal article supplement (doi:10.1039/c8nr04703k), 2018-01-01
Supplement: c8nr04703k1.pdf [file c8nr04703k1.pdf]

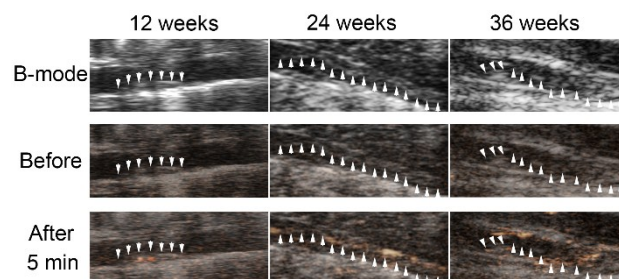

Figure. S1. CEUS images of aorta ventralis atherosclerotic plaques of mice with different ages before and after injecting CD68-Fe-HSNs. White solid arrows refer to atherosclerotic plaques.
